# Network Assisted Analysis of *De Novo* Variants Using Protein-Protein Interaction Information Identified 46 Candidate Genes for Congenital Heart Disease

Yuhan Xie<sup>1</sup>, Wei Jiang<sup>1</sup>, Weilai Dong<sup>2</sup>, Hongyu Li<sup>1</sup>, Sheng Chih Jin<sup>3</sup>, Martina Brueckner<sup>2,4</sup>, Hongyu Zhao<sup>1,2,5\*</sup>

<sup>1</sup> Department of Biostatistics, Yale School of Public Health, New Haven, CT, USA 06520

<sup>2</sup> Department of Genetics, Yale School of Medicine, New Haven, CT, USA 06520

<sup>3</sup> Department of Genetics, Washington University School of Medicine, St Louis, MO, USA 63110

<sup>4</sup> Department of Pediatrics, Yale University, New Haven, CT, USA 06520

<sup>5</sup> Program in Computational Biology and Bioinformatics, Yale University, New Haven, CT, USA 06520

\* To whom correspondence should be addressed:

Hongyu Zhao, Ph.D.

Department of Biostatistics, Yale School of Public Health, 60 College Street, New Haven, CT, 06520, USA

Email: [hongyu.zhao@yale.edu](mailto:hongyu.zhao@yale.edu)

## Abstract

*De novo* variants (DNVs) with deleterious effects have proved informative in identifying risk genes for early-onset diseases such as congenital heart disease (CHD). A number of statistical methods have been proposed for family-based studies or case/control studies to identify risk genes by screening genes with more DNVs than expected by chance in Whole Exome Sequencing (WES) studies. However, the statistical power is still limited for cohorts with thousands of subjects. Under the hypothesis that connected genes in protein-protein interaction (PPI) networks are more likely to share similar disease association status, we develop a Markov Random Field model that can leverage information from publicly available PPI databases to increase power in identifying risk genes. We identified 46 candidate genes with at least 1 DNV in the CHD study cohort, including 18 known human CHD genes and 35 highly expressed genes in mouse developing heart. Our results may shed new insight on the shared protein functionality among risk genes for CHD.

## Keywords

*De novo* variants, protein-protein interactions, congenital heart disease, network modeling

## 1 **Background**

2 Congenital heart disease (CHD) is the most common birth defect affecting ~ 1% of live births  
3 and accounts for one-third of all major congenital abnormalities [1-3]. There is substantial  
4 evidence that CHD has a strong genetic component [4]. Although it is estimated that  
5 aneuploidies and copy number variations account for about 23% of CHD cases, few individual  
6 disease-causing genes have been identified in published studies [5-8]. Therefore, the limited  
7 knowledge on the underlying genetic causes poses an obstacle to the reproductive counseling  
8 of CHD patients [9].

9  
10 Whole Exome Sequencing (WES) studies have successfully boosted novel causal genes  
11 identification for both Mendelian and complex disorders [10, 11]. To narrow down the pool of  
12 candidate variants from WES, family-based studies have been conducted to scan for *de novo*  
13 variants (DNVs) from parent-offspring trios. DNV studies have been shown to play an important  
14 role in risk gene identification for CHD [1, 3, 5, 6, 12-15]. From the analysis of 1,213 CHD  
15 parent-offspring trios, Homsy et al. identified greater burden of damaging DNVs, especially in  
16 genes with likely functional roles in heart and brain development [12]. Recently, Jin et al.  
17 inferred that DNVs in ~440 genes were likely contributors to CHD [5]. Despite these advances, it  
18 remains challenging to capture the causal genes with only DNV data as CHD is very genetically  
19 heterogeneous [6].

20  
21 It is believed that genes interact with each other in biological processes and may jointly affect  
22 the disease risk through biological pathways. In recent studies on CHD, researchers reported  
23 significant enrichment of genes related to histone modification, chromatin modification, cilia  
24 function, transcriptional regulation, neural tube development, and cardiac development and  
25 enrichment in pathways including Wnt, Notch, Igf, HDAC, ErbB and NF-kb signaling [1, 3, 12, 14,  
26 16]. These results suggest that considering functional relationships of genes through pathway-

27 level analyses may complement gene-level analyses and improve risk gene identification for  
28 CHD.

29  
30 Recently, Nguyen et al. proposed a framework to conduct pathway-level analysis on  
31 schizophrenia DNV data [17]. Their method is built on the extTADA framework and integrates  
32 pathway information by multiplying a gene-set related term in the likelihood function. However,  
33 this method requires curated pathways related to schizophrenia and treats genes as  
34 exchangeable without considering gene-gene interactions. To characterize the functional  
35 connectivity between genes, we can consider genes as a network by modeling the topology of  
36 pathways.

37  
38 Network-based approaches have been successful in prioritizing risk genes for downstream  
39 analysis of Genome-Wide Association Studies (GWAS) and gene expression studies [18-20].  
40 Chen et al. [19] proposed a Markov Random Field (MRF) model to incorporate pathway  
41 topology structure for GWAS. They showed that their method is more powerful than single  
42 gene-based methods through both simulation and real data analyses. Following the idea of this  
43 framework, Hou et al. [20] proposed a method that integrates co-expression networks and  
44 GWAS results. By applying their method to Crohn's disease and Parkinson's disease, they  
45 showed that their method could lead to more replicable results and find potential disease-  
46 associated pathways. More recently, Liu et al. adopted a similar idea as Chen et al. and Hou et  
47 al. to analyze DNV data from WES studies [21]. Their framework, namely DAWN, combines  
48 TADA p-values with estimated network from gene co-expression data. In their real data analysis  
49 for autism, 333 genes were prioritized by integrating DNV summary statistics and expression  
50 data from brain tissue. However, all of these above methods require summary statistics (Z  
51 scores or p-values) from genetic association analysis as their input, which may not be provided  
52 for DNV analysis results [22, 23]. In addition, it is difficult to apply DAWN directly to CHD

53 because of the lack of ideal co-expression data from relevant tissues (such as developmental  
54 heart) for CHD.

55  
56 As there is a limited number of co-expression data sets for human developmental heart, a  
57 natural choice for network information would be human protein-protein interaction (PPI)  
58 databases. There are multiple public sources of PPI network databases such as BioGRID [24],  
59 IntAct [25], DIP [26], MINT [27], and HPRD [28]. Most of network-based studies apply their real  
60 data on two or more of the databases to obtain their results. Nonetheless, it is hard to check the  
61 overlapping information between two PPI databases and interpret the divergent results. The  
62 STRING [29] database provides a platform to resolve the above problems. It imports protein  
63 association knowledge from physical interaction and curated knowledge from the  
64 aforementioned PPI databases and other pathway information knowledge such as KEGG and  
65 GO. In addition, it provides a score to measure the likelihood of interactions. Some studies have  
66 used STRING in their post-association analysis for gene-based DNV studies and showed  
67 significant enrichment of candidate CHD risk genes in the STRING PPI network [30, 31]. One  
68 recent study [3] constructed a priority score based on canonical pathways and PPI networks  
69 and identified 23 novel genes for CHD. These results suggest that incorporating PPI network  
70 information from STRING may identify additional risk genes with more biological interpretability.

71  
72 In addition, in the post-association analysis of CHD DNV analysis from our previous multi-trait  
73 method M-DATA [32], we found that the number of edges formed by candidate CHD genes (47  
74 edges, green line in Fig 1A) identified by M-DATA multi-trait model (33 genes with false  
75 discovery rate (FDR)  $q$ -values  $< 0.1$ ) is far larger than the upper tail of the empirical distribution  
76 sampled from 33 randomly selected genes in the STRING V11.0 database (score threshold:  
77 400) for 10,000 times (Fig 1A). This suggests that the candidate CHD genes are highly enriched  
78 in terms of their interactions in the STRING database. To further illustrate that PPI information

79 may contribute to CHD gene discovery, we use the CHD result from M-DATA single-trait  
80 analysis and use the result of autism as a comparison. Fig 1B shows the number of edges  
81 formed by the top genes (ranked by FDR q-values) for CHD and autism from M-DATA single-  
82 trait model with a more stringent selection of PPI edges in the STRING database (score  
83 threshold: 950), respectively. To compare with the number of edges formed by randomly  
84 selected genes, we plot the 95% quantile of the empirical distribution sampled from random  
85 genes in the STRING v11.0 database (score threshold: 950) for 10,000 times as a baseline.  
86 When more than 25 top CHD genes are selected, the number of edges formed by these genes  
87 is significantly more than that from randomly selected genes, whereas the number of edges  
88 formed by the autism top genes did not differ much from randomly selected genes. This  
89 suggests top genes in CHD tend to be neighbors in the STRING PPI network.

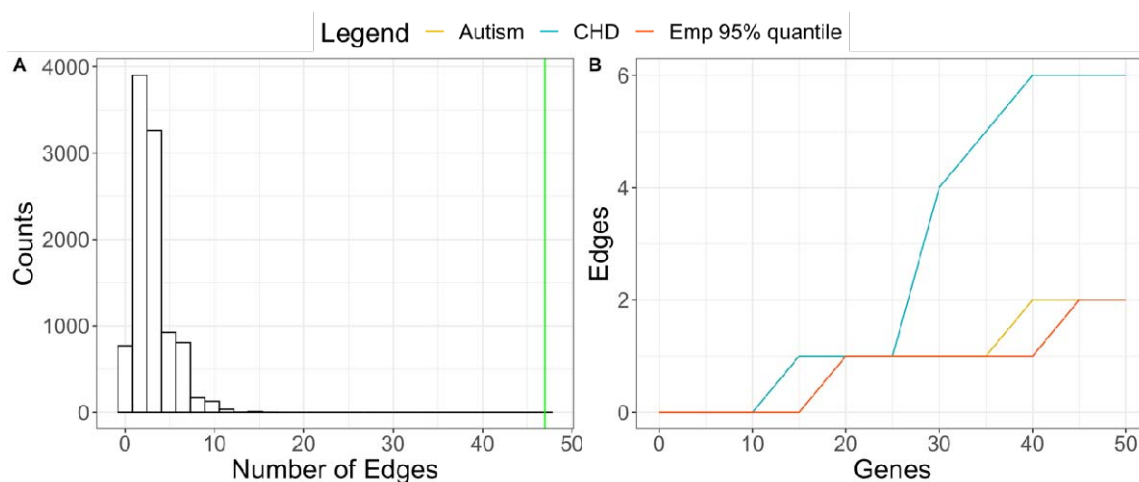

90  
91 **Fig 1. CHD top genes are more connected than randomly selected genes in the STRING PPI network** (A) Empirical  
92 distribution of the number of edges formed by 33 randomly selected genes. Green line represents the number of edges formed by  
93 the 33 CHD top genes from M-DATA. (B) Number of edges formed by CHD top genes, autism top genes from single-trait analyses  
94 and randomly selected genes, respectively.

95  
96 Motivated by the observation from Fig 1, we develop a **Network assisted model for De novo**  
97 **Association Test** using protein-protein interAction information, named N-DATA, to leverage prior

98 information of interactions among genes from the PPI network to boost statistical power in  
 99 identifying risk genes for CHD. In the following, we first introduce the inference procedure for  
 100 our model, and then demonstrate the performance of our method through simulation studies  
 101 and real data applications.

102

### 103 **Methods**

104 In this section, we introduce the statistical model for the proposed framework. The network  
 105 information in the PPI database is represented by an undirected graph  $G = (V, E)$ , where  
 106  $V = \{1, \dots, n\}$  is a set of  $n$  genes in the network, and  
 107  $E = \{ \langle i, j \rangle : i \text{ and } j \text{ are genes connected by the edges} \}$ . The degree of a gene  $i$  is defined as the  
 108 number of direct neighbors ( $N_i$ ) for gene  $i$  in the network and denoted as  $d_i$ . We denote the  
 109 latent association status of gene  $i$  with a disease of interest, e.g., CHD, as  $S_i$ , where  $S_i = 1$  if  
 110 gene  $i$  is associated with the disease,  $S_i = -1$  if gene  $i$  is not associated with the disease.  
 111  $S = \{S_1, \dots, S_n\}$  are the corresponding latent states for genes in  $V = \{1, \dots, n\}$ . The DNV count of  
 112 the cohort is defined as  $Y_i$ . To formalize the assumption that genes that have PPIs with risk  
 113 genes are more likely to be risk genes, we apply a nearest neighbor Gibbs measure [33] to  
 114 arrive at the following model:

$$P(S|\theta_0) \propto \exp \left\{ h \sum_{i \in V} I_1(S_i) + \tau_0 \sum_{\langle i, j \rangle \in E} (w_i + w_j) I_{-1}(S_i) I_{-1}(S_j) + \tau_1 \sum_{\langle i, j \rangle \in E} (w_i + w_j) I_1(S_i) I_1(S_j) \right\}$$

$$Y_i | S_i = -1 \sim \text{Poisson}(2N\mu_i)$$

$$Y_i | S_i = 1 \sim \text{Poisson}(2N\mu_i\gamma)$$

$$\theta_0 = (h, \tau_0, \tau_1); \theta_1 = \gamma,$$

115

116 where  $w_i$  is the weight for gene  $i$  and will be chosen based on the characteristics of the  
 117 network,  $\theta_0 = (h, \tau_0, \tau_1)$  are hyperparameters related to the network. Specifically,  $h$  determines

118 the marginal distribution of  $S_i$  when all genes are independent i.e.,  $P(S_i = 1|h, \tau_0 = \tau_1 = 0) =$   
119  $\frac{\exp(h)}{1+\exp(h)}$ .  $\tau_0$  and  $\tau_1$  characterize the prior weights of edges between non-associated genes and  
120 associated genes, respectively.  $N$  is the sample size of the case cohort,  $\mu_i$  is the mutability of  
121 gene  $i$  estimated using the framework in Samocha et al. [34], and  $\theta_1$  ( $\gamma$ ) is the relative risk of  
122 the DNVs in the risk gene.

123  
124 To reduce the computational burden from a fully Bayesian solution for maximizing the marginal  
125 likelihood, we propose an empirical Bayes method to estimate the parameters  $\theta_0$  and  $\theta_1$ , and  
126 the latent association status  $S$  by maximizing the pseudo conditional likelihood (PCLK) for  $n$   
127 genes as follows

$$\text{PCLK} = \prod_{i=1}^n f(Y_i|S_i, \theta_1) \Pr(S_i|S_{N_i}, \theta_0).$$

128 It has been shown that the estimator from the PCLK in a general Markov random field setting is  
129 consistent under mild regularity conditions [19] [35]. When maximizing the PCLK, we can  
130 estimate the hyperparameters  $\theta_0$ ,  $\theta_1$  and latent status  $S$  iteratively.

131  
132 We can obtain an empirical estimate for  $\theta_0$  by maximizing  $\prod_{i=1}^n \Pr(S_i|S_{N_i}, \theta_0)$ , which is  
133 equivalent to maximizing the parameters in the following logistic regression model:

$$\text{logit} \Pr(S_i|S_{N_i}, \theta_0) = h + \tau_1 X_{i1} - \tau_0 X_{i0},$$

134 where  $X_{i1} = w_i \sum_{k \in N_i} I_1(S_k) + \sum_{k \in N_i} w_k I_1(S_k)$  and  $X_{i0} = w_i \sum_{k \in N_i} I_{-1}(S_k) + \sum_{k \in N_i} w_k I_{-1}(S_k)$ ,  $i =$   
135  $1, \dots, n$ . To make sure the estimated  $\theta_0$  is finite, we can add a ridge penalty term  $\lambda(h^2 + \tau_0^2 + \tau_1^2)$   
136 to the likelihood function to solve the maximization problem by the Newton-Raphson's method  
137 [36].

138



139 We then update the latent status  $S$  by maximizing the PCLK using the iterative conditional mode  
 140 method [35]. After we obtain the updated values  $\theta_0$  and  $S$ , we can estimate the hyperparameter  
 141  $\theta_1$  by maximizing  $\prod_{i=1}^n f(Y_i | S_i, \theta_1)$  by using the following closed-form expression:

$$\log L(\theta_1 | Y) \propto \log \prod_{S_i=1} \exp(-2\mu N \gamma + Y_i \log \gamma)$$

$$\frac{\partial \log L(\theta_1 | Y)}{\partial \gamma} = - \sum_{S_i=1} 2\mu N + \frac{\sum_{S_i=1} Y_i}{\gamma}$$

$$\hat{\gamma} = \frac{\sum_{S_i=1} Y_i}{\sum_{S_i=1} 2\mu N}$$

142

---

Algorithm 1: Procedure for Parameter Estimation

---

1. Set initial configuration  $S^0$
2. In the  $j$ th iteration, for given  $s^{(j-1)}$ , obtain  $\hat{\theta}_0^j$  from

$$\text{logit Pr}(S_i^{(j-1)} | S_{N_i}^{(j-1)}, \theta_0) = h + \tau_1 X_{i1} - \tau_0 X_{i0}, \quad i = 1, \dots, n$$

3. Sequentially update the labels of nodes to obtain  $S^{(j)}$  (ICM)

$$S_i^{(j)} = \arg \max_{S_i} f(Y_i | S_i, \hat{\theta}_1^{(j-1)}) \Pr(S_i | S_{N_i}^{(j-1)}, \hat{\theta}_0^{(j)}) \prod_{k \in S_N} \Pr(S_k^{(j-1)} | S_i, S_{N_k-i}^{(j-1)}, \hat{\theta}_0^{(j)})$$

4. Obtain  $\hat{\theta}_1^j$  ( $\hat{\gamma}^{(j)}$ ) from

$$\hat{\theta}_1^{(j)} = \operatorname{argmax}_{\theta_1} \log L(\theta_1 | \theta_0^{(j)}, S^{(j)}, Y)$$

5. Repeat steps 2, 3, and 4 until convergence
- 

143

144

145 Finally, after we obtain the estimated  $\hat{\theta}_0$  and  $\hat{\theta}_1$ , we use Gibbs sampling based on the  
 146 conditional distribution  $P(S_i | S_{N_i}, \hat{\theta}_0, \hat{\theta}_1)$ . This method has been proved to be valid for multiple  
 147 testing under dependence in a compound decision theoretic framework [37, 38]. Then, we can

148 estimate the marginal posterior probability  $q_i = P(S_i = -1|Y)$ . Let  $q_{(i)}$  be the sorted values of  $q_i$   
149 in descending order. For each gene  $i$ , the null hypothesis and alternative hypothesis are

150  $H_{i0}$ : Gene  $i$  is not associated with the trait of interest

151  $H_{i1}$ : Gene  $i$  is associated with the trait of interest

152 As shown by Jiang and Yu [39], the relationship between global FDR and local FDR (lfd<sub>r</sub>) is  
153  $FDR = E(lfd_r|Y \in \mathcal{R})$ , where the rejection region  $\mathcal{R}$  is the set of  $Y$  such that the null hypothesis  
154 can be rejected based on a specific rejection criterion. To control the expected global FDR less  
155 than  $\alpha$ , we propose the following procedure: let  $m = \max \{s: \frac{1}{s} \sum_{i=1}^s q_{(i)}\}$ , we reject all the null  
156 hypotheses corresponding to  $H_{(1)}, \dots, H_{(m)}$ .

157

## 158 **Results**

### 159 **Simulation Studies**

160 For DNV and network data, we considered similar settings as our real data. We randomly  
161 selected 2,000 genes, retrieved their mutability from the real data, and extracted the  
162 corresponding PPI network formed by these 2,000 genes. First, we simulated the true model  
163 with parameter values similar as those from real data analysis to see whether N-DATA can  
164 control FDR. Then, we evaluated the power under various settings of sample sizes  $N$  and  
165 relative risk parameter  $\gamma$ .

166

167 We set true network parameter  $\theta_0$  as (-4, 0.2, 0) to make the total number of risk genes in the  
168 network of 2,000 random genes to be around 100. We varied the sample size  $N$  at 2,000, 5,000  
169 and 10,000 to evaluate the performance of N-DATA in small, medium, and large WES cohorts,  
170 respectively. In addition, we varied  $\beta$  (log relative risk parameter  $\gamma$ ) at 3.5, 4 and 4.5 to  
171 investigate the performance of N-DATA around the burden estimated results from real data (In  
172 real data analysis,  $\hat{\beta} = 3.60$ ). Each simulation setting was replicated 100 times. For Gibbs

173 sampling-based inference, we used 2,000 MCMC iterations, and set the first 1,000 iterations as  
174 burn-ins. These numbers were chosen empirically based on the diagnostic plots for  
175 convergence. We report the performance under FDR threshold 0.05 in the main text (Fig 2) and  
176 FDR threshold 0.01 and 0.1 in Additional File 1.

177  
178 First, we compared the performance of N-DATA model with and without the PPI network as  
179 input. For N-DATA model without the PPI network, we assigned the weight of gene for  
180 inference. Both models controlled FDR well under all the settings. N-DATA model with PPI  
181 network had much better power than the model without PPI network when the sample size and  
182 were both low. When the sample size and were larger, the power of N-DATA without PPI  
183 network improved as expected.

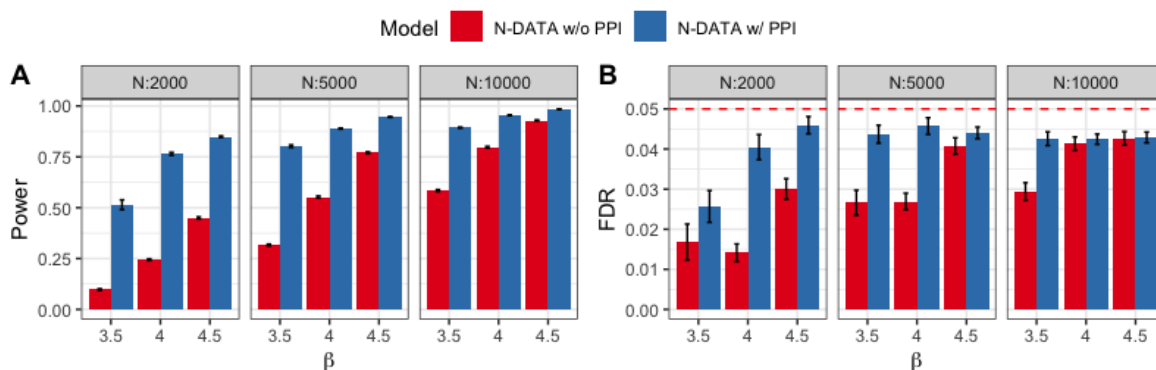

184  
185 **Fig 2. Comparison of N-DATA w/o and w/ PPI network models.** (A) Power comparison of the two models. Three  
186 panels from left to right represent cohorts with small, medium, and large sample sizes, respectively. (B) FDR control  
187 for the two models. Red dash line represents the preset FDR threshold 0.05. Three panels from left to right represent  
188 cohorts with small, medium, and large sample sizes, respectively.

189  
190 Then, we compared the power of TADA-*De novo*, DAWN, and N-DATA using the same  
191 parameter settings. Hyperprior of TADA-*De novo* was estimated from the function *denovo.MOM*  
192 based on the recommendation from the authors [40]. Power of TADA was calculated based on  
193 TADA q-values. DAWN v1.0 was downloaded from

194 [http://www.compgen.pitt.edu/DAWN/DAWN\\_homepage.htm](http://www.compgen.pitt.edu/DAWN/DAWN_homepage.htm). We adapted the code of DAWN to  
 195 use adjacency matrices of networks as its input. We used TADA-*De novo* p-values and PPI  
 196 network as the input of DAWN. The parameter trim threshold was set to 4 based on the  
 197 observation in our real data that, which corresponds to select the top 5 genes in TADA-*De novo*  
 198 as fixed risk genes.

199  
 200 We compared the performance of TADA-*De novo*, TADA-*De novo* p-values + DAWN and N-  
 201 DATA under different simulation settings. We reported the performance under FDR threshold  
 202 0.05 in the main text (Fig 3) and FDR threshold 0.01 and 0.1 in Additional File 1. We first  
 203 checked if all three methods could control the global FDR when the threshold is 0.05. As  
 204 discussed above, N-DATA controlled FDR well under all settings, while there was slight FDR  
 205 inflation of TADA-*De novo* and DAWN under a couple of settings, especially when both  $\alpha$  and  $\beta$   
 206 were very small or very large. N-DATA had the best power among the three methods under all  
 207 settings. With an increase of  $\alpha$  and  $\beta$ , the performance of TADA-*De novo* and DAWN also  
 208 became better. For settings with FDR well controlled, DAWN performed better than TADA-*De*  
 209 *novo*.

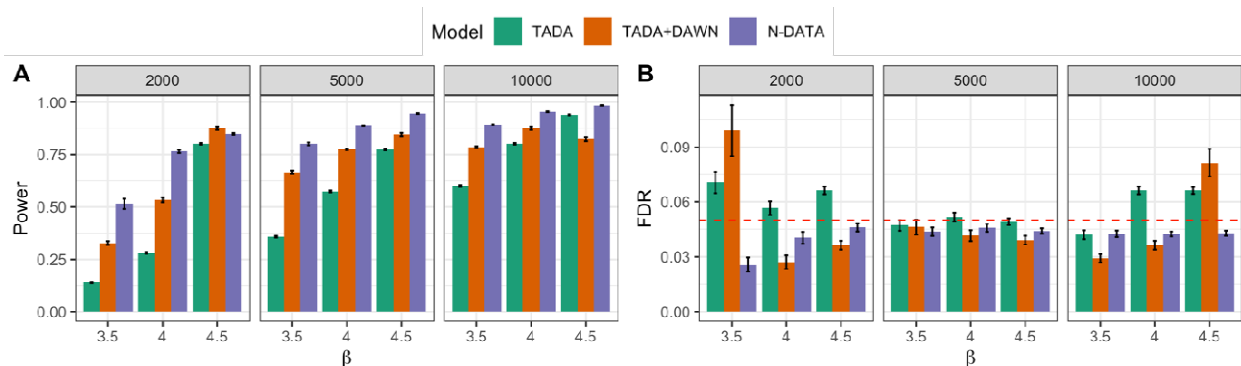

210  
 211 **Fig 3. Comparison of TADA-*De novo*, TADA-*De novo* p-values + DAWN and N-DATA.** Error bars represent  
 212 standard errors estimated from 100 replications of simulation. (A) Power comparison of the three methods. Three  
 213 panels from left to right represent cohorts with small, medium, and large sample sizes, respectively. (B) FDR control

214 for the three methods. Red dash line represents the preset FDR threshold 0.05. Three panels from left to right  
215 represent cohorts with small, medium, and large sample sizes, respectively.

216

## 217 **Real Data Applications**

218 We applied N-DATA to DNV data from 2,645 CHD trios reported in Jin et al [5]. We only  
219 considered damaging variants (loss of function (LoF) and deleterious missense (Dmis) variants  
220 by the MetaSVM algorithm) in our analysis as the number of non-deleterious variants is not  
221 expected to provide information to differentiate cases from controls biologically [41].

222

223 For network information, we first downloaded STRING v11.0 with medium edge likelihood via  
224 interface from STRINGdb package in R, and call this original network from STRING  $\mathcal{G}_0$ . We  
225 obtained the curated list of known human CHD genes from Jin et al [5] and expanded the gene  
226 list by including additional candidate genes (FDR<0.1) from the single-trait analysis in our  
227 previous work [32]. Then, we extracted the subnetwork including the aforementioned gene list  
228 and the direct neighbors with likelihood score larger than 950 of those genes, and call this  
229 subnetwork  $\mathcal{G}_1$ . We only kept overlapping genes with our DNV data in  $\mathcal{G}_1$  and called the final  
230 network used in our real application as  $\mathcal{G}_2$ . There were in total 1,818 genes and 21,534 edges in  
231  $\mathcal{G}_2$ .

232

233 To show that our method can leverage network information to boost risk gene identification, we  
234 applied our algorithm without using the network as an input. When there was no prior  
235 information from the network, we identified 18 significant genes with FDR<0.05. To include the  
236 network information from  $\mathcal{G}_2$ , we denote the degree of gene  $i$  in network  $\mathcal{G}_2$  as  $d_i$ , and let the  
237 weight in the prior as  $w_i = \sqrt{d_i}$  following Chen et al. [19]. After adding the network information  
238 from  $\mathcal{G}_2$ , we identified 46 genes with at least 1 DNV, and 26 genes harboring at least 2 DNVs  
239 with FDR<0.05 in the CHD cohort.

240

241 We also compared our results with TADA-*De novo* test [40] and DAWN [21, 42]. We  
 242 downloaded the software of DAWN and adapted its code by substituting the adjacency matrix  
 243 inferred from its Partial Neighborhood Selection algorithm to the adjacency matrix from network  
 244  $\mathcal{G}_2$ . The parameter settings were discussed in the simulation section. Specifically, we also  
 245 compared two approaches to control the global FDR for TADA-*De novo* test (FDR q-values and  
 246 p-values with FDR adjustment). FDR q-values given by TADA-*De novo* identified 25 significant  
 247 genes, and p-values with FDR adjustment identified the same 25 genes. After integrating the p-  
 248 values with the  $\mathcal{G}_2$  network, 36 genes were identified by the adapted DAWN method. In total, N-  
 249 DATA identified 325 genes with FDR<0.05. As some of the genes may be prioritized due to high  
 250 prior probability, but did not have DNV count in the study cohort, we further filtered out genes  
 251 without DNV and considered the 46 genes identified with FDR<0.05 and at least 1 DNV as the  
 252 candidate genes. (Table 1)

| Method                                                            | Criteria                    | Number of Identified Genes |
|-------------------------------------------------------------------|-----------------------------|----------------------------|
| TADA- <i>De novo</i> q-values                                     | FDR<0.05                    | 25                         |
| TADA- <i>De novo</i> p-values                                     | FDR<0.05                    | 25                         |
| DAWN<br>(Network $\mathcal{G}_2$ + TADA- <i>De novo</i> p-values) | FDR<0.05                    | 36                         |
| N-DATA<br>(Network $\mathcal{G}_2$ network + DNV counts)          | FDR<0.05<br>▪ DNVs $\geq$ 1 | 325<br>46                  |

253 **Table 1.** Comparison of N-DATA with other methods

254

255 We visualized the overlap of 253 known human CHD genes [5], genes that were identified by  
256 TADA-*De novo* q-values, DAWN, and N-DATA in Fig 4. Fig 4A shows the 325 genes identified  
257 by N-DATA, while Fig 4B shows the 46 genes with at least 1 DNV. From Fig 4B, N-DATA found  
258 all genes that can be identified by TADA, and identified 11 different genes compared with  
259 DAWN.  
260

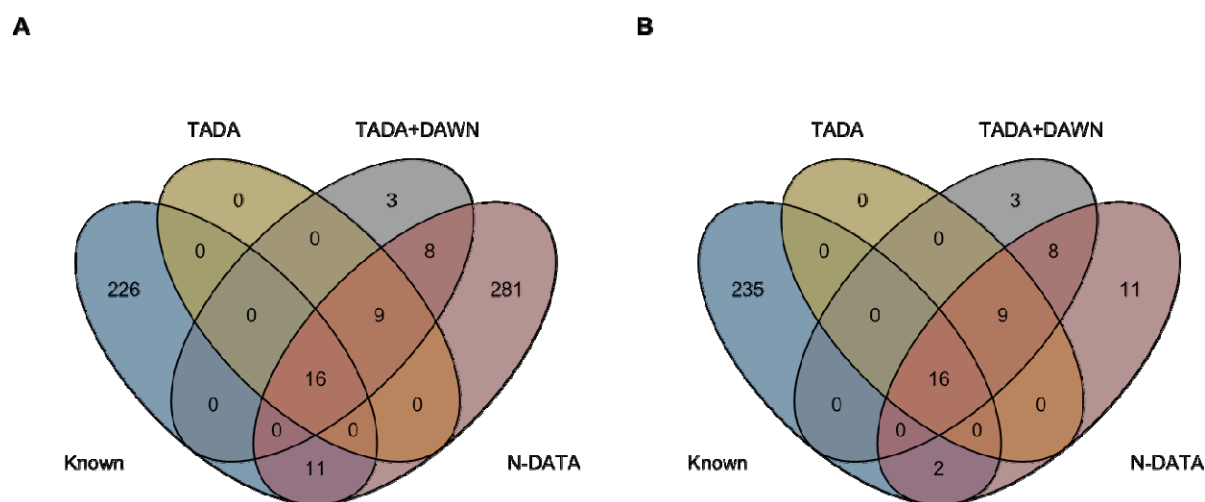

261  
262 **Fig 4. Venn diagram of known human CHD genes, TADA genes, DAWN genes and N-DATA genes. (A)**  
263 Overlapping genes between known human CHD genes, TADA- *De novo*, TADA-*De novo* +DAWN and all 325 genes  
264 identified by N-DATA. (B) Overlapping genes between known human CHD genes, TADA- *De novo*, TADA-*De novo*  
265 +DAWN and 46 candidate genes identified by N-DATA.

266  
267 Among the 46 genes, 18 are known human CHD genes and 35 are in the top 25% in mouse  
268 developing heart (HHE) at E14.5 [12]. Further, we calculated the overlap of the 46 N-DATA  
269 candidate genes, TADA genes, DAWN genes and 872 HHE genes that were analyzed in the  
270 1,818 gene network. (Fig 5).

271

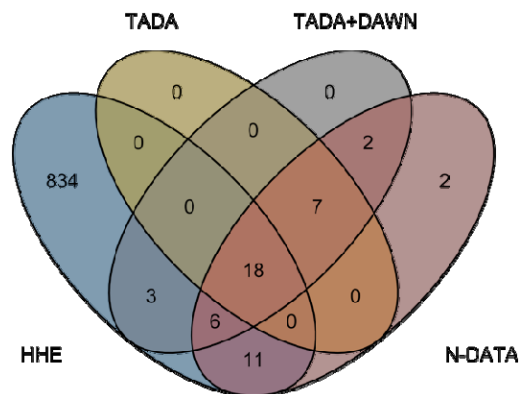

272  
 273 **Fig 5. Venn diagram of HHE genes, TADA genes, DAWN genes and the 46 N-DATA candidate genes.** N-DATA  
 274 candidate genes identified 11 additional HHE genes compared with other methods.

275  
 276 We also visualized these 46 genes in the network to demonstrate that the PPI network  
 277 information can help boost statistical power and provide biological interpretation.

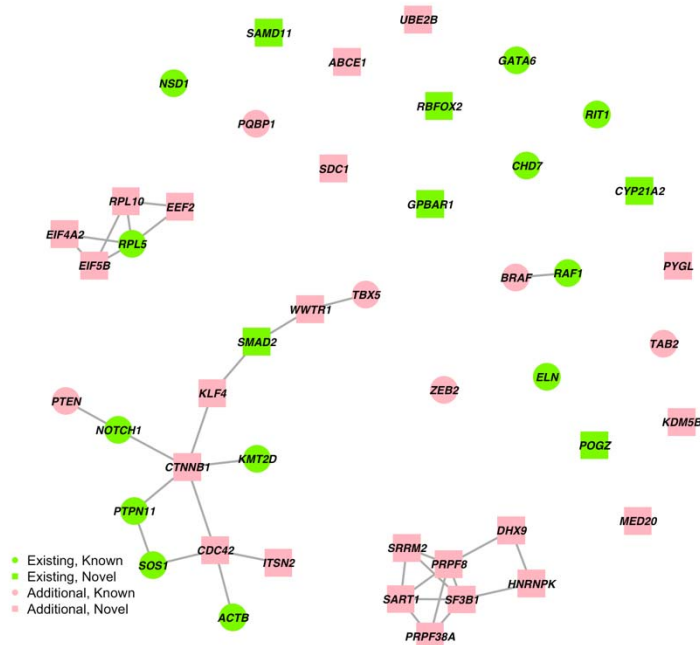

278  
 279 **Fig 6. N-DATA model identified 46 candidate genes with at least 1 DNV.** Green labels indicate the 18 genes  
 280 identified when no network information was provided for N-DATA, and red labels indicate the additional 28 genes



281 identified when the  $G_2$  network was integrated. Circles indicate the 18 known human CHD genes, and squares  
282 indicate the 28 novel genes identified by N-DATA.

283

284 Among the 46 candidate genes, *PTPN11*, *RAF1* and *RIT1* had 2 recurrent DNVs, and *CHD7*,  
285 *NOTCH1*, *NSD1* and *PYGL* also had recessive genotypes in the CHD cohort [5]. The 46  
286 candidate genes form 4 clusters (Fig 6) in the  $G_2$  network. The biggest cluster includes seven  
287 known CHD genes *TBX5*, *KMT2D*, *PTPN11*, *SOS1*, *ACTB*, *NOTCH1*, and *PTEN*, which are  
288 involved in transcriptional regulation and the early cell growth or differentiation processes. The  
289 six new genes *SMAD2*, *KLF4*, *CTNNB1*, *CDC42*, *ITSN2*, and *WWTR1* also function in similar  
290 pathways and have varied implications in cardiac development. For instance, *KLF4* and  
291 *CTNNB1* have been implicated in cardiac cell differentiation [43]. *Cdc42* cardiomyocyte knock-  
292 out mice presented heart defects such as ventricular septum defects and thin ventricular walls  
293 [44]. *WWTR1* encodes a transcription regulator, which serves as an effector of Hippo pathway  
294 and regulates cardiac wall maturation in zebrafish [45].

295

296 The second biggest cluster is constituted of 7 new genes, all of which are involved in mRNA  
297 splicing. Specifically, *SART1*, *SRRM2*, *PRPF38A*, *PRPF8*, and *SF3B1* are associated factors or  
298 components of spliceosome; *HNRNPK* encodes a pre-mRNA-binding protein; *DHX9* encodes  
299 an RNA helicase which promotes R-loop formation while RNA splicing is perturbed [46].

300 Alternative splicing plays an essential role in heart development, homeostasis, and disease  
301 pathogenesis. Mouse knockouts of multiple splice factors had impaired cardiogenesis [47].

302 *SF3B1*, specifically, has been shown to upregulate to induce heart disease in both human and  
303 mice [48]. Thus, though not fully investigated, DNVs in those mRNA splicing-related genes may  
304 contribute to CHD pathogenesis.

305

306 The third cluster contains genes involved in protein synthesis, includes the known gene *RPL5*  
307 and genes not previously associated with CHD (*EIF4*, *EIF5*, *EEF2*, and *RPL10*). *RPL5* and  
308 *RPL10* encode the ribosome subunits. Mutations in *RPL5* and other ribosomal genes can lead  
309 to multiple congenital anomalies, including CHD [49]. *EIF4* and *EIF5* encode translation initiation  
310 factors while *EEF2* encodes the elongation factor that regulate peptide chain elongation during  
311 protein synthesis. A recent study reported that the deficiency in ribosome associated NatA  
312 complex reduces ribosomal protein and subsequently impact cell development as a mechanism  
313 to cause CHD [50]. Thus, DNVs in the above genes may lead to CHD via impairment of protein  
314 synthesis.

315  
316 The last cluster contains the known CHD genes *BRAF* and *RAF1*, both of which encode key  
317 kinases in Ras signaling and are related to Noonan syndrome with CHD as a common feature.

318  
319 Among the un-clustered genes, six are identified after using the network information: *ABCE1*,  
320 *UBE2B*, *SDC1*, *PYGL*, *KDM5B*, *MED20*. *UBE2B* and *KDM5B*, encoding epigenetic modifiers,  
321 have shown suggestive evidence in cardiac development or CHD [51] [52] and might be  
322 potential CHD genes.

323

## 324 **Discussion**

325 In this article, we have introduced a Bayesian framework to integrate PPI network information as  
326 the prior knowledge into DNV analysis for CHD. This approach adopts MRF to model the  
327 interactions among genes. We apply an empirical Bayes strategy to estimate parameters in the  
328 model and conduct statistical inference based on the posterior distribution sampled from a  
329 Gibbs sampler. The simulation studies and real data analysis on CHD suggest that the  
330 proposed method has improved power to identify risk genes over methods without integrating  
331 network information.

332

333 Our proposed framework is innovative for the following aspects. First, it can directly infer  
334 disease-associated genes using a network-based model without relying on summary statistics  
335 from other DNV association software. Second, it does not need to estimate hyperprior based on  
336 other sources compared to the existing pathway-based test for DNV data [17, 31]. Third, it does  
337 not require external expression data for the DNV cohort and uses the publicly available PPI  
338 database instead, which makes it more applicable to different diseases. This method will not  
339 only increase power in risk gene identification, but will also assist in biological interpretation by  
340 visualizing clusters of risk genes with functional relevance in the network.

341

342 However, there are some limitations in the current N-DATA model. In real application, it is  
343 important to conduct an initial analysis on the enrichment of top genes identified from *de novo*  
344 association test in the network like our motivating example. Another limitation is that the  
345 likelihood-based inference may suffer from local maxima [19]. Thus, we recommend to initiate  
346 the labels of genes from a known risk gene set or run with multiple starts. Also, we observe the  
347 Gibbs sampler tends to move around local maxima for some time before convergence. We  
348 suggest running at least 2,000 times of iterations and discard the first 1,000 iterations as burn-  
349 ins. In addition, we only considered damaging DNVs and assumed the relative risk parameter  $\gamma$   
350 is the same across all genes in N-DATA, which may cause our model to lose power if it varies  
351 across variants with different functions (e.g., LoF and Dmis). Future studies may explore adding  
352 functional annotation of variants as a layer in the model to further improve statistical power.

353

## 354 **Conclusions**

355 The topologic information in a pathway may be informative to identify functionally interrelated  
356 genes and help improve statistical power in DNV studies. Under the hypothesis that connected  
357 genes in PPI networks are more likely to share similar disease association status, we developed

358 a novel statistical model that can leverage information from publicly available PPI databases.  
359 Through simulation studies under multiple settings, we proved our method can increase  
360 statistical power in identifying additional risk genes compared to methods without using the PPI  
361 network information. We then applied our method to the CHD DNV data, and then visualized the  
362 subnetwork of candidate genes to find potential functional gene clusters for CHD. Our results  
363 may shed new insight on the shared protein functionality among risk genes for CHD.

364

### 365 **List of abbreviations**

366 DNV: *de novo* variant

367 CHD: congenital heart disease

368 WES: Whole Exome Sequencing

369 PPI: protein-protein Interaction

370 FDR: false discovery rate

371 MRF: Markov Random Field

372 GWAS: Genome-Wide Association Studies

373

### 374 **References**

- 375 1. Zaidi S, Choi M, Wakimoto H, Ma L, Jiang J, Overton JD, Romano-Adesman A, Bjornson  
376 RD, Breitbart RE, Brown KK, et al: **De novo mutations in histone-modifying genes in**  
377 **congenital heart disease.** *Nature* 2013, **498**:220-223.
- 378 2. Postma AV, Bezzina CR, Christoffels VM: **Genetics of congenital heart disease: the**  
379 **contribution of the noncoding regulatory genome.** *Journal of Human Genetics* 2016,  
380 **61**:13-19.
- 381 3. Sevim Bayrak C, Zhang P, Tristani-Firouzi M, Gelb BD, Itan Y: **De novo variants in exomes**  
382 **of congenital heart disease patients identify risk genes and pathways.** *Genome Med*  
383 2020, **12**:9.
- 384 4. Diab NS, Barish S, Dong W, Zhao S, Allington G, Yu X, Kahle KT, Brueckner M, Jin SC:  
385 **Molecular Genetics and Complex Inheritance of Congenital Heart Disease.** *Genes*  
386 (*Basel*) 2021, **12**.

- 387 5. Jin SC, Homsy J, Zaidi S, Lu Q, Morton S, DePalma SR, Zeng X, Qi H, Chang W, Sierant MC,  
388 et al: **Contribution of rare inherited and de novo variants in 2,871 congenital heart**  
389 **disease probands.** *Nat Genet* 2017, **49**:1593-1601.
- 390 6. Zaidi S, Brueckner M: **Genetics and Genomics of Congenital Heart Disease.** *Circ Res*  
391 2017, **120**:923-940.
- 392 7. Glessner JT, Bick AG, Ito K, Homsy J, Rodriguez-Murillo L, Fromer M, Mazaika E,  
393 Vardarajan B, Italia M, Leipzig J, et al: **Increased frequency of de novo copy number**  
394 **variants in congenital heart disease by integrative analysis of single nucleotide**  
395 **polymorphism array and exome sequence data.** *Circ Res* 2014, **115**:884-896.
- 396 8. Soemedi R, Wilson IJ, Bentham J, Darlay R, Töpf A, Zelenika D, Cosgrove C, Setchfield K,  
397 Thornborough C, Granados-Riveron J, et al: **Contribution of global rare copy-number**  
398 **variants to the risk of sporadic congenital heart disease.** *Am J Hum Genet* 2012,  
399 **91**:489-501.
- 400 9. Pierpont ME, Brueckner M, Chung WK, Garg V, Lacro RV, McGuire AL, Mital S, Priest JR,  
401 Pu WT, Roberts A, et al: **Genetic Basis for Congenital Heart Disease: Revisited: A**  
402 **Scientific Statement From the American Heart Association.** *Circulation* 2018, **138**:e653-  
403 e711.
- 404 10. Teer JK, Mullikin JC: **Exome sequencing: the sweet spot before whole genomes.** *Human*  
405 *Molecular Genetics* 2010, **19**:R145-R151.
- 406 11. Rabbani B, Tekin M, Mahdieh N: **The promise of whole-exome sequencing in medical**  
407 **genetics.** *Journal of Human Genetics* 2014, **59**:5-15.
- 408 12. Homsy J, Zaidi S, Shen Y, Ware JS, Samocha KE, Karczewski KJ, DePalma SR, McKean D,  
409 Wakimoto H, Gorham J, et al: **De novo mutations in congenital heart disease with**  
410 **neurodevelopmental and other congenital anomalies.** *Science* 2015, **350**:1262-1266.
- 411 13. Richter F, Morton SU, Kim SW, Kitaygorodsky A, Wasson LK, Chen KM, Zhou J, Qi H, Patel  
412 N, DePalma SR: **Genomic analyses implicate noncoding de novo variants in congenital**  
413 **heart disease.** *Nature genetics* 2020, **52**:769-777.
- 414 14. Watkins WS, Hernandez EJ, Wesolowski S, Bisgrove BW, Sunderland RT, Lin E, Lemmon  
415 G, Demarest BL, Miller TA, Bernstein D: **De novo and recessive forms of congenital**  
416 **heart disease have distinct genetic and phenotypic landscapes.** *Nature*  
417 *communications* 2019, **10**:1-12.
- 418 15. Sifrim A, Hitz M-P, Wilsdon A, Breckpot J, Turki SHA, Thienpont B, McRae J, Fitzgerald  
419 TW, Singh T, Swaminathan GJ, et al: **Distinct genetic architectures for syndromic and**  
420 **nonsyndromic congenital heart defects identified by exome sequencing.** *Nature*  
421 *Genetics* 2016, **48**:1060-1065.
- 422 16. Sifrim A, Hitz MP, Wilsdon A, Breckpot J, Turki SH, Thienpont B, McRae J, Fitzgerald TW,  
423 Singh T, Swaminathan GJ, et al: **Distinct genetic architectures for syndromic and**  
424 **nonsyndromic congenital heart defects identified by exome sequencing.** *Nat Genet*  
425 2016, **48**:1060-1065.
- 426 17. Nguyen TH, He X, Brown RC, Webb BT, Kendler KS, Vladimirov VI, Riley BP, Bacanu SA:  
427 **DECO: a framework for jointly analyzing de novo and rare case/control variants, and**  
428 **biological pathways.** *Brief Bioinform* 2021.

- 429 18. Lee I, Blom UM, Wang PI, Shim JE, Marcotte EM: **Prioritizing candidate disease genes by**  
430 **network-based boosting of genome-wide association data.** *Genome Res* 2011, **21**:1109-  
431 1121.
- 432 19. Chen M, Cho J, Zhao H: **Incorporating biological pathways via a Markov random field**  
433 **model in genome-wide association studies.** *PLoS Genet* 2011, **7**:e1001353.
- 434 20. Hou L, Chen M, Zhang CK, Cho J, Zhao H: **Guilt by rewiring: gene prioritization through**  
435 **network rewiring in genome wide association studies.** *Hum Mol Genet* 2014, **23**:2780-  
436 2790.
- 437 21. Liu L, Lei J, Roeder K: **Network assisted analysis to reveal the genetic basis of autism.**  
438 *The Annals of Applied Statistics* 2015, **9**:1571-1600, 1530.
- 439 22. Nguyen HT, Bryois J, Kim A, Dobbyn A, Huckins LM, Munoz-Manchado AB, Ruderfer DM,  
440 Genovese G, Fromer M, Xu X, et al: **Integrated Bayesian analysis of rare exonic variants**  
441 **to identify risk genes for schizophrenia and neurodevelopmental disorders.** *Genome*  
442 *Med* 2017, **9**:114.
- 443 23. Nguyen T-H, Dobbyn A, Brown RC, Riley BP, Buxbaum JD, Pinto D, Purcell SM, Sullivan PF,  
444 He X, Stahl EA: **mTADA is a framework for identifying risk genes from de novo**  
445 **mutations in multiple traits.** *Nature Communications* 2020, **11**:2929.
- 446 24. Oughtred R, Stark C, Breitkreutz BJ, Rust J, Boucher L, Chang C, Kolas N, O'Donnell L,  
447 Leung G, McAdam R, et al: **The BioGRID interaction database: 2019 update.** *Nucleic*  
448 *Acids Res* 2019, **47**:D529-d541.
- 449 25. Orchard S, Ammari M, Aranda B, Breuza L, Briganti L, Broackes-Carter F, Campbell NH,  
450 Chavali G, Chen C, del-Toro N, et al: **The MIntAct project--IntAct as a common curation**  
451 **platform for 11 molecular interaction databases.** *Nucleic Acids Res* 2014, **42**:D358-363.
- 452 26. Salwinski L, Miller CS, Smith AJ, Pettit FK, Bowie JU, Eisenberg D: **The Database of**  
453 **Interacting Proteins: 2004 update.** *Nucleic Acids Res* 2004, **32**:D449-451.
- 454 27. Licata L, Briganti L, Peluso D, Perfetto L, Iannuccelli M, Galeota E, Sacco F, Palma A,  
455 Nardoza AP, Santonico E, et al: **MINT, the molecular interaction database: 2012**  
456 **update.** *Nucleic Acids Res* 2012, **40**:D857-861.
- 457 28. Mishra GR, Suresh M, Kumaran K, Kannabiran N, Suresh S, Bala P, Shivakumar K,  
458 Anuradha N, Reddy R, Raghavan TM, et al: **Human protein reference database--2006**  
459 **update.** *Nucleic Acids Res* 2006, **34**:D411-414.
- 460 29. Szklarczyk D, Gable AL, Lyon D, Junge A, Wyder S, Huerta-Cepas J, Simonovic M,  
461 Doncheva NT, Morris JH, Bork P, et al: **STRING v11: protein-protein association**  
462 **networks with increased coverage, supporting functional discovery in genome-wide**  
463 **experimental datasets.** *Nucleic Acids Res* 2019, **47**:D607-d613.
- 464 30. Nguyen TH, Dobbyn A, Brown RC, Riley BP, Buxbaum JD, Pinto D, Purcell SM, Sullivan PF,  
465 He X, Stahl EA: **mTADA is a framework for identifying risk genes from de novo**  
466 **mutations in multiple traits.** *Nat Commun* 2020, **11**:2929.
- 467 31. Nguyen HT, Dobbyn A, Charney AW, Bryois J, Kim A, Mcfadden W, Skene NG, Huckins  
468 LM, Wang W, Ruderfer DM, et al: **Integrative analysis of rare variants and pathway**  
469 **information shows convergent results between immune pathways, drug targets and**  
470 **epilepsy genes.** *bioRxiv* 2018:410100.
- 471 32. Xie Y, Li M, Dong W, Jiang W, Zhao H: **M-DATA: A statistical approach to jointly**  
472 **analyzing de novo mutations for multiple traits.** *PLoS Genet* 2021, **17**:e1009849.

- 473 33. Kindermann R: **Markov random fields and their applications**. *American mathematical*  
474 *society* 1980.
- 475 34. Samocha KE, Robinson EB, Sanders SJ, Stevens C, Sabo A, McGrath LM, Kosmicki JA,  
476 Rehnröm K, Mallick S, Kirby A, et al: **A framework for the interpretation of de novo**  
477 **mutation in human disease**. *Nat Genet* 2014, **46**:944-950.
- 478 35. Besag J: **On the statistical analysis of dirty pictures**. *Journal of the Royal Statistical*  
479 *Society: Series B (Methodological)* 1986, **48**:259-279.
- 480 36. Le Cessie S, Van Houwelingen JC: **Ridge estimators in logistic regression**. *Journal of the*  
481 *Royal Statistical Society: Series C (Applied Statistics)* 1992, **41**:191-201.
- 482 37. Sun W, Tony Cai T: **Large - scale multiple testing under dependence**. *Journal of the*  
483 *Royal Statistical Society: Series B (Statistical Methodology)* 2009, **71**:393-424.
- 484 38. Li H, Wei Z, Maris J: **A hidden Markov random field model for genome-wide association**  
485 **studies**. *Biostatistics* 2010, **11**:139-150.
- 486 39. Jiang W, Yu W: **Controlling the joint local false discovery rate is more powerful than**  
487 **meta-analysis methods in joint analysis of summary statistics from multiple genome-**  
488 **wide association studies**. *Bioinformatics* 2016, **33**:500-507.
- 489 40. He X, Sanders SJ, Liu L, De Rubeis S, Lim ET, Sutcliffe JS, Schellenberg GD, Gibbs RA, Daly  
490 MJ, Buxbaum JD, et al: **Integrated model of de novo and inherited genetic variants**  
491 **yields greater power to identify risk genes**. *PLoS Genet* 2013, **9**:e1003671.
- 492 41. Li M: **Gene-based Association Analysis for Genome-wide Association and Whole-**  
493 **exome Sequencing Studies**. Yale University, Biostatistics; 2020.
- 494 42. Liu L, Lei J, Sanders SJ, Willsey AJ, Kou Y, Cicek AE, Klei L, Lu C, He X, Li M, et al: **DAWN: a**  
495 **framework to identify autism genes and subnetworks using gene expression and**  
496 **genetics**. *Mol Autism* 2014, **5**:22.
- 497 43. Kami D, Kitani T, Kawasaki T, Gojo S: **Cardiac mesenchymal progenitors differentiate**  
498 **into adipocytes via Klf4 and c-Myc**. *Cell death & disease* 2016, **7**:e2190-e2190.
- 499 44. Liu Y, Wang J, Li J, Wang R, Tharakan B, Zhang SL, Tong CW, Peng X: **Deletion of Cdc42 in**  
500 **embryonic cardiomyocytes results in right ventricle hypoplasia**. *Clinical and*  
501 *translational medicine* 2017, **6**:40-40.
- 502 45. Lai JKH, Collins MM, Uribe V, Jiménez-Amilburu V, Günther S, Maischein HM, Stainier  
503 DYR: **The Hippo pathway effector Wwtr1 regulates cardiac wall maturation in**  
504 **zebrafish**. *Development* 2018, **145**.
- 505 46. Chakraborty P, Huang JTJ, Hiom K: **DHX9 helicase promotes R-loop formation in cells**  
506 **with impaired RNA splicing**. *Nat Commun* 2018, **9**:4346.
- 507 47. Zahr HC, Jaalouk DE: **Exploring the Crosstalk Between LMNA and Splicing Machinery**  
508 **Gene Mutations in Dilated Cardiomyopathy**. *Front Genet* 2018, **9**:231.
- 509 48. van den Hoogenhof MM, Pinto YM, Creemers EE: **RNA Splicing: Regulation and**  
510 **Dysregulation in the Heart**. *Circ Res* 2016, **118**:454-468.
- 511 49. Gazda HT, Sheen MR, Vlachos A, Choessel V, O'Donohue MF, Schneider H, Darras N,  
512 Hasman C, Sieff CA, Newburger PE, et al: **Ribosomal protein L5 and L11 mutations are**  
513 **associated with cleft palate and abnormal thumbs in Diamond-Blackfan anemia**  
514 **patients**. *Am J Hum Genet* 2008, **83**:769-780.

- 515 50. Ward T, Tai W, Morton S, Impens F, Van Damme P, Van Haver D, Timmerman E,  
516 Venturini G, Zhang K, Jang MY, et al: **Mechanisms of Congenital Heart Disease Caused**  
517 **by NAA15 Haploinsufficiency**. *Circ Res* 2021, **128**:1156-1169.
- 518 51. Robson A, Makova SZ, Barish S, Zaidi S, Mehta S, Drozd J, Jin SC, Gelb BD, Seidman CE,  
519 Chung WK, et al: **Histone H2B monoubiquitination regulates heart development via**  
520 **epigenetic control of cilia motility**. *Proc Natl Acad Sci U S A* 2019, **116**:14049-14054.
- 521 52. Audain E, Wilsdon A, Breckpot J, Izarzugaza JMG, Fitzgerald TW, Kahlert AK, Sifrim A,  
522 Wünnemann F, Perez-Riverol Y, Abdul-Khaliq H, et al: **Integrative analysis of genomic**  
523 **variants reveals new associations of candidate haploinsufficient genes with congenital**  
524 **heart disease**. *PLoS Genet* 2021, **17**:e1009679.  
525

## 526 **Acknowledgements**

527 We thank Jin et al. [5] for sharing the *de novo* variant data of CHD. We thank Andrew Xu and Dr.  
528 Min Chen for discussions on coding, and Ziyu Jiang for discussions on diagnostic for Bayesian  
529 inference.

530

## 531 **Funding**

532 This work was supported in part by NIH grant R03HD100883-01A1 (Y.X. and H.Z.) and  
533 R01GM134005-01A1 (W.J., H.L., and H.Z.). The funders had no role in study design, data  
534 collection and analysis, decision to publish, or preparation of the manuscript.

535

## 536 **Ethics Declaration**

### 537 **Ethics approval and consent to participate**

538 This manuscript is a mainly methodology paper. The data used in this manuscript is all public  
539 available. The research has no procedure related to collecting human subject data.

### 540 **Consent for publication**

541 Not applicable.

### 542 **Competing interests**

543 The authors declare that they have no competing interests.



544 **Supplementary Information**

545 Additional File 1. Supplementary figures 1-4

546
